# Supplementary material
Source: PubMed Central journal article supplement (PMC5835026)
Supplement: mmc1.pdf [file mmc1.pdf]

YMTHE, Volume 26

## **Supplemental Information**

### **miR-23b Suppresses Leukocyte Migration and Pathogenesis of Experimental Autoimmune Encephalomyelitis by Targeting CCL7**

**Yuan Zhang, Juan-Juan Han, Xiao-Yan Liang, Li Zhao, Fei Zhang, Javad Rasouli, Zhe-Zhi Wang, Guang-Xian Zhang, and Xing Li**

## Supplementary Figure 1

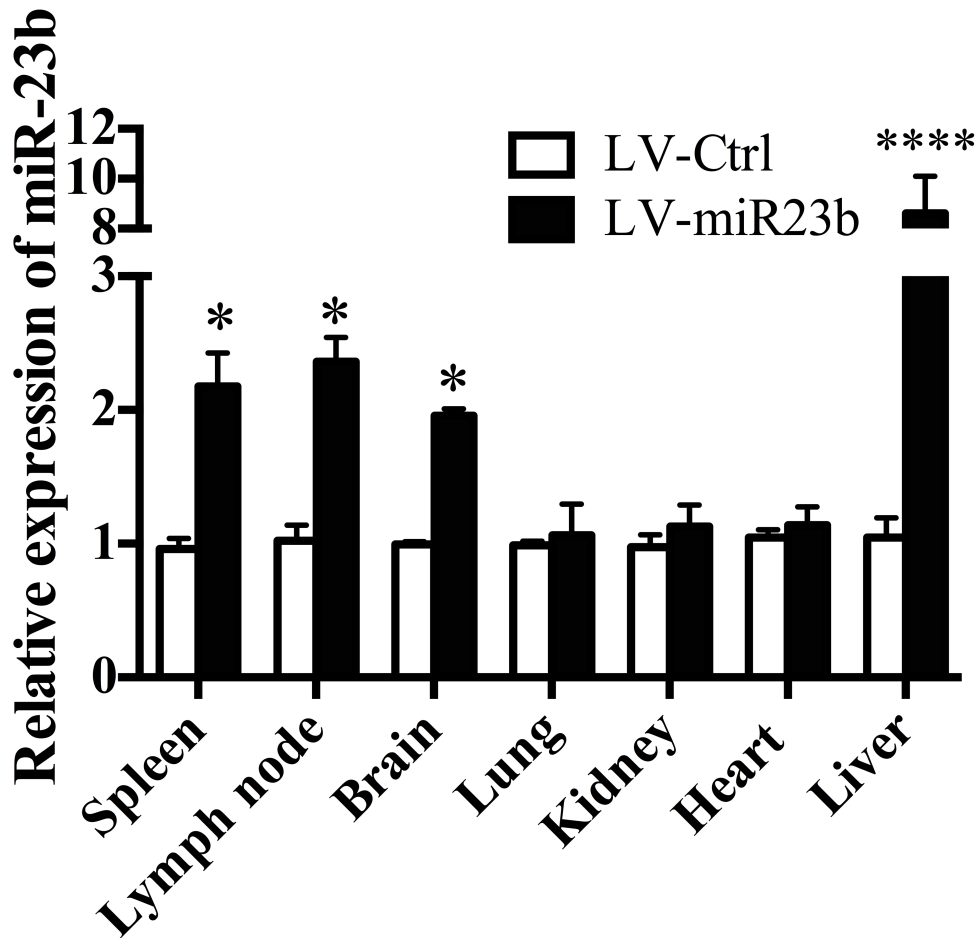

**Supplementary Figure 1.** qPCR analysis of miR-23b expression from spleen, lymph node, brain, lung, kidney, heart and liver of mice infected with LV-Ctrl and LV-miR23b after 5 d. Fold change are normalized to the average of LV-Ctrl-infected mice are presented relative to RNU6B. Lentivirus infected mice, n = 3. \* p < 0.05; \*\*\*\* p < 0.0001.

## Supplementary Figure 2

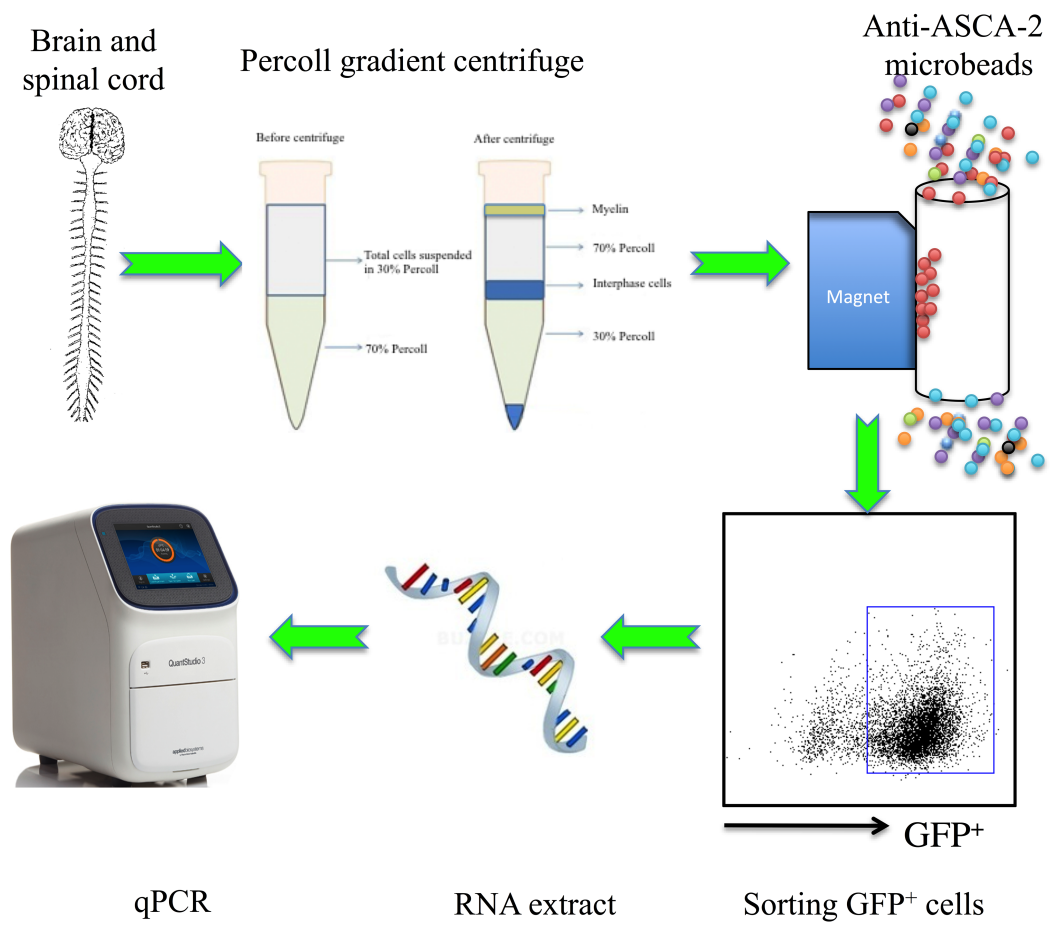

**Supplementary Figure 2.** Flow chart of determines the CCL7 expression level from GFP<sup>+</sup> astrocytes.

### Supplementary Figure3

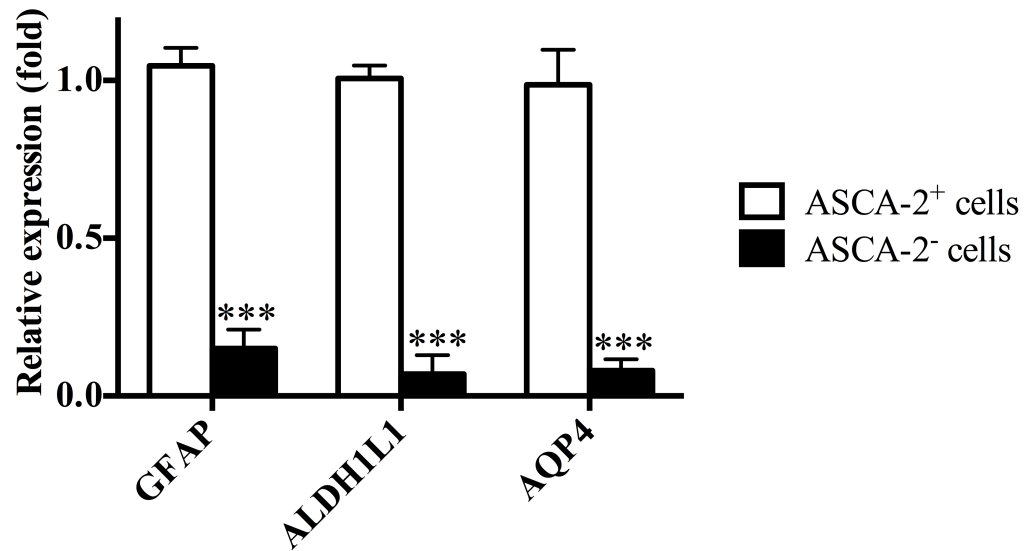

**Supplementary Figure 3.** qPCR analysis of astrocytes isolated from brain and spinal cord tissue by anti-ASCA-2 microbeads. Data are  $\pm$  SD (n=3) (Two-way ANOVA). \*\*\*p< 0.001.

**Table S1.** Primers used for pTRE3G-BI-copGFP/mCherry-CCL7UTR vector construction

| Primer name         | Sequences (5'-3')                           |
|---------------------|---------------------------------------------|
| GFP SalI F:         | ACT GTC GAC ATG GAG AGC GAC GAG AGC GG      |
| GFP BglII R:        | CTT ATA GCT TTA GCG AGA TCC GGT GGA GC      |
| mCherry EcoRI F:    | ACT GAA TTC ATG GTG AGC AAG GGC GAG GA      |
| mCherry XbaI R:     | CTT TCT AGA TGG ACG AGC TGT ACA AGT AA      |
| mCCL7 3'UTR BamHI F | ACT GGA TCC TGCCTGAACAGAAACCAACC            |
| mCCL7 3'UTR NotI R  | CTT GCG GCC GCT GAT TCT TGC AAA GTC CCT TCA |

**Table S2.**

| Gene  | Primers                |                       |
|-------|------------------------|-----------------------|
|       | Sense (5'-3')          | Anti-sense (5'-3')    |
| CCR2  | GCCATCATAAAGGAGCCATACC | TGTGGTGAATCCAATGCCCT  |
| CCR5  | CTGCTGCCTAAACCCTGTCA   | TGCAAAAGCGTTTGACCATGT |
| CCR6  | GCCCTGGAAAGCTGGGTA     | GGCAGACACTCACAGTACCC  |
| CCR7  | GGAAACCCAGGAAAAACGTGC  | TCCTTCTTGAAGCACACCGA  |
| CXCR3 | ACAACTGAGGCCTCCTACCT   | ATGCTGAGCTGTCAGTGCAT  |
| CCL2  | CAGGTCCCTGTCATGCTTCT   | GTGGGGCGTTAACTGCATCT  |
| CCL3  | GCTTCTCCTACAGCCGGAAG   | AGGTCTCTTTGGAGTCAGCG  |
| CCL4  | CCCAGCTCTGTGCAAACCTA   | CCATTGGTGTGAGAACCCT   |
| CCL5  | GTGCCACGTCAAGGAGTAT    | TTCTCTGGGTTGGCACACAC  |
| CCL7  | CGCTGCTTTCAGCATCCAAG   | CTTCCCAGGGACACCGACTA  |
| CCL8  | TCTACGCAGTGCTTCTTTGC   | AGCAGGTGACTGGAGCCTTA  |
| CCL9  | GCCCAGATCACACATGCAAC   | AGGACAGGCAGCAATCTGAA  |
| CCL11 | AGAGCTCCACAGCGCTTCTA   | GGAAGTTGGGATGGAGCCTG  |
| CCL19 | GAAGACTGCTGCCTGTCTGT   | GCCCCTTAGTGTGGTGAACA  |
| CCL20 | AGCAGCAAGCAACTACGACT   | TGGATCAGCGCACACAGATT  |
